# Supplementary material for: Arginine does not rescue p.Q188R mutation deleterious effect in classic galactosemia
Source: Springer Nature journal article supplement (doi:10.1186/s13023-018-0954-8), 2018-11-26
Supplement: MOESM1 [file 16295780]

Supplementary Figure S1

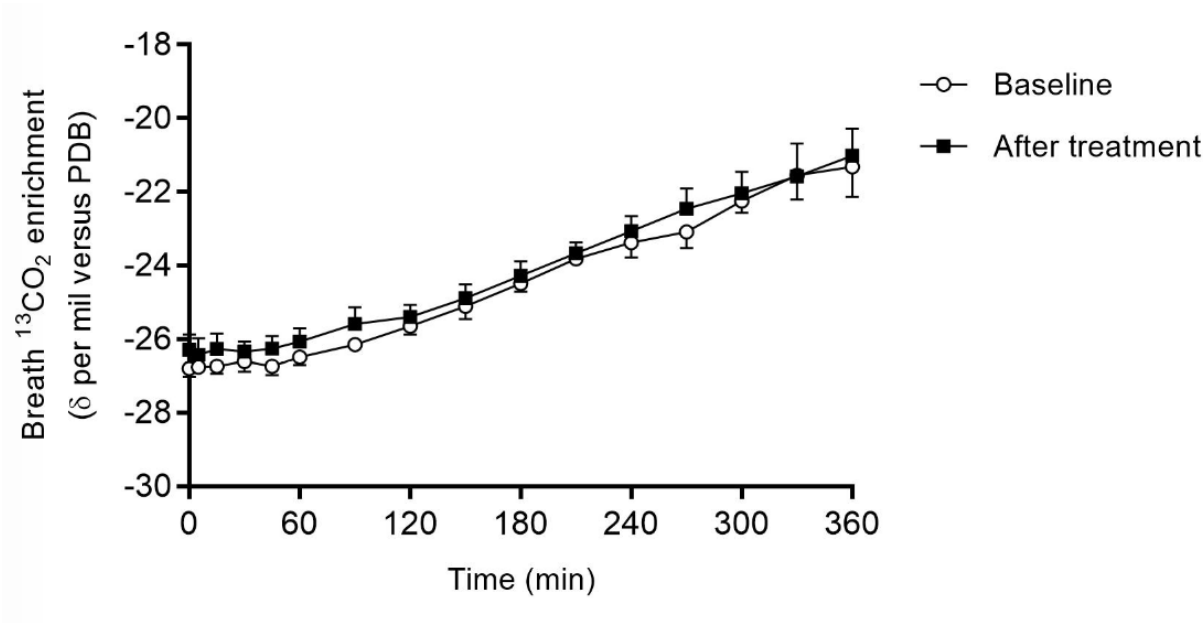

**Supplementary Figure S1. Expired breath <sup>13</sup>CO<sub>2</sub> enrichments.** Expired breath <sup>13</sup>CO<sub>2</sub> enrichments of the four galactosemia patients, before and after arginine aspartate supplementation. Results are expressed as mean ± SEM.
