# Supplementary material for: Arginine does not rescue p.Q188R mutation deleterious effect in classic galactosemia
Source: Springer Nature journal article supplement (doi:10.1186/s13023-018-0954-8), 2018-11-26
Supplement: MOESM2 [file 16295780]

## Supplementary Table S1

**Supplementary Table S1. Concentration of arginine in the cell culture supernatant.** The concentration of arginine was measured at day 0 and 3 of incubation in two wildtype (Control line 1 and 2) and two classic galactosemic fibroblasts derived from two p.Q188R/p.Q188R patients (cell lines CG1 and CG2) in the absence and in the presence of supplemental arginine (0.1 mM and 1 mM arginine). Results are expressed as  $\mu\text{M}$ .

|                                        | 0 mM arginine | 0.1 mM arginine | 1 mM arginine |
|----------------------------------------|---------------|-----------------|---------------|
| <b>Media at day 0</b>                  | 531           | 657             | 1548          |
| <b>Media at day 3 - CG line 1</b>      | 486           | 587             | 1374          |
| <b>Media at day 3 - CG line 2</b>      | 547           | 606             | 1562          |
| <b>Media at day 0</b>                  | 484           | 524             | 1346          |
| <b>Media at day 3 - Control line 1</b> | 475           | 550             | 1339          |
| <b>Media at day 3 - Control line 2</b> | 463           | 530             | 1317          |
